# Supplementary material for: circIFT80 Functions as a ceRNA of miR-1236-3p to Promote Colorectal Cancer Progression
Source: PubMed Central journal article supplement — Mol Ther Nucleic Acids. 2019 Sep 3;18:375–87. doi: 10.1016/j.omtn.2019.08.024 (PMC6819894; doi:10.1016/j.omtn.2019.08.024), 2019-09-03
Supplement: mmc1.pdf [file mmc1.pdf]

**OMTN, Volume 18**

**Supplemental Information**

**circIFT80 Functions as a ceRNA of miR-1236-3p  
to Promote Colorectal Cancer Progression**

**Wenming Feng, Hui Gong, Yongchun Wang, Guoliang Zhu, Tao Xue, Yao Wang, and Ge Cui**

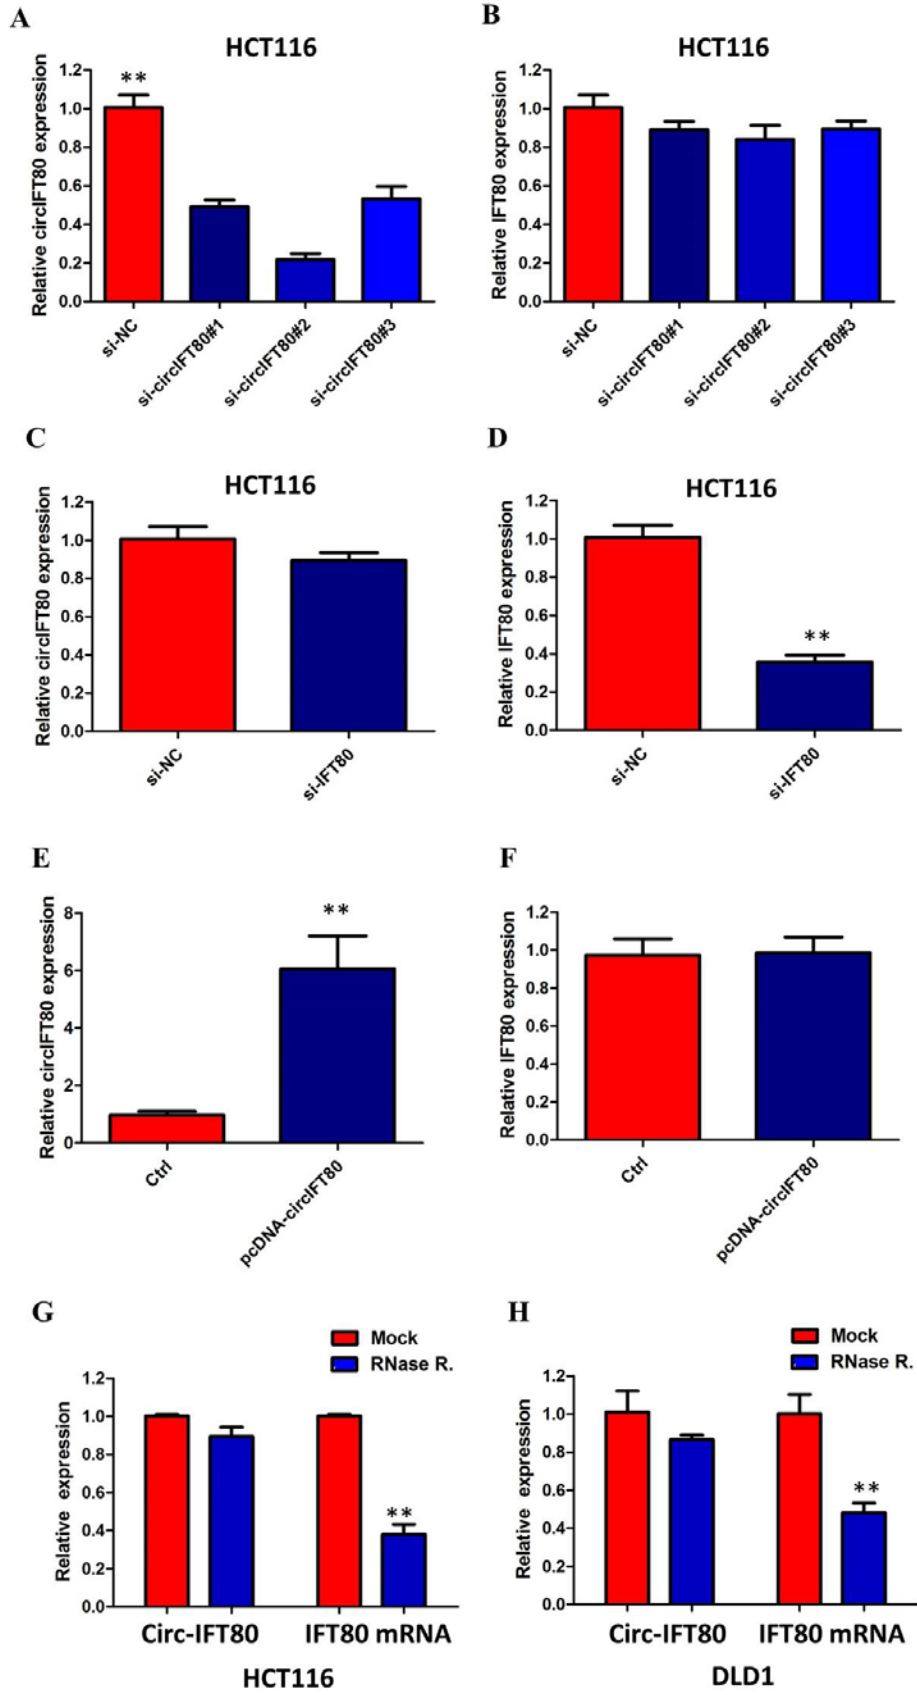

**Fig. S1** A. The qRT-PCR assay indicated the expression level of circIFT80 in HCT116 cells treated with si-circIFT80. Data are the means  $\pm$  SD of three experiments,  $**P<0.01$ ; B. The qRT-PCR assay indicated the expression level of IFT80 in HCT116 cells treated with si-circIFT80. Data are the means  $\pm$  SD of three experiments; C. The qRT-PCR assay indicated the expression level of circIFT80 in HCT116 cells treated with si-IFT80. Data are the means  $\pm$  SD of three experiments; D. The qRT-PCR assay indicated the expression level of IFT80 in HCT116 cells treated with si-IFT80. Data are the means  $\pm$  SD of three experiments,  $**P<0.01$ ; E. The qRT-PCR assay indicated the expression level of circIFT80 in HT-29 cells infected with circIFT80 overexpression plasmid,  $**P<0.01$ ; F. The qRT-PCR assay indicated the expression level of IFT80 in HT-29 cells infected with circIFT80 overexpression plasmid,  $**P<0.01$ ; G. circIFT80 was resistant to RNase R digestion in HCT116 cells. Data are the means  $\pm$  SD of three experiments,  $**P<0.01$ ; H. circIFT80 was resistant to RNase R digestion in DLD1 cells. Data are the means  $\pm$  SD of three experiments,  $**P<0.01$ ;
